# Supplementary material for: Salmonella in Captive Reptiles and Their Environment—Can We Tame the Dragon?
Source: MDPI journal article supplement (doi:10.3390/microorganisms9051012), 2021-05-08
Supplement: s1 [file s1]

Table S1. *Salmonella* serovars (n =151) isolated from different media from single samples: from MSRV, both from MSRV and RSA and only from RSA. Serovars obtained exclusively from RSA (n = 25) were bolded.

| <i>Salmonella</i> serovar        | MSRV     | MSRV and RSA | RSA      | Total    |
|----------------------------------|----------|--------------|----------|----------|
| <i>S. Newport</i>                | 2        | 2            | 8        | 12       |
| <i>S. II 58:a:z6</i>             | 1        | 1            | 8        | 10       |
| <i>S. II 30:l,z28:z6</i>         | 22       | 13           | 7        | 42       |
| <i>S. Fluntern</i>               | 14       | 15           | 5        | 34       |
| <b><i>S. II 50:b:z6</i></b>      | <b>0</b> | <b>0</b>     | <b>4</b> | <b>4</b> |
| <i>S. Tennessee</i>              | 10       | 13           | 3        | 26       |
| <i>S. IIIb 53:z10:z35</i>        | 1        | 4            | 3        | 8        |
| <i>S. Hadar</i>                  | 2        | 1            | 3        | 6        |
| <i>S. Monschau</i>               | 2        | 0            | 3        | 5        |
| <i>S. IIIb 14:z10:z</i>          | 1        | 0            | 3        | 4        |
| <i>S. Muenchen</i>               | 11       | 6            | 2        | 19       |
| <i>S. Pomona</i>                 | 7        | 2            | 2        | 11       |
| <i>S. Ago</i>                    | 5        | 1            | 2        | 8        |
| <i>S. II 16:m,t:-</i>            | 3        | 1            | 2        | 6        |
| <i>S. IIIb 47:k:z35</i>          | 3        | 0            | 2        | 5        |
| <i>S. Paratyphi B v.Java</i>     | 3        | 0            | 2        | 5        |
| <i>S. Aqua</i>                   | 1        | 1            | 2        | 4        |
| <i>S. IIIb 57:k:enxz15</i>       | 0        | 1            | 2        | 3        |
| <b><i>S. IIIb 59:k:z</i></b>     | <b>0</b> | <b>0</b>     | <b>2</b> | <b>2</b> |
| <b><i>S. IIIb 59:z52:z53</i></b> | <b>0</b> | <b>0</b>     | <b>2</b> | <b>2</b> |
| <i>S. Agona</i>                  | 16       | 8            | 1        | 25       |
| <i>S. Oranienburg</i>            | 18       | 4            | 1        | 23       |
| <i>S. Kentucky</i>               | 11       | 4            | 1        | 16       |
| <i>S. II 1,40:g,m,t:-</i>        | 10       | 3            | 1        | 14       |
| <i>S. Infantis</i>               | 4        | 8            | 1        | 13       |
| <i>S. IIIa 41:z4,z23:-</i>       | 5        | 3            | 1        | 9        |
| <i>S. Adelaide</i>               | 4        | 1            | 1        | 6        |
| <i>S. Typhimurium</i>            | 2        | 2            | 1        | 5        |
| <i>S. Florida</i>                | 3        | 0            | 1        | 4        |
| <i>S. IV 44:z4,z23:-</i>         | 1        | 2            | 1        | 4        |
| <i>S. Apapa</i>                  | 2        | 0            | 1        | 3        |
| <i>S. Gatuni</i>                 | 1        | 1            | 1        | 3        |
| <i>S. IIIb 48:i:z</i>            | 2        | 0            | 1        | 3        |
| <i>S. IIIb 61:z52:z53</i>        | 1        | 1            | 1        | 3        |
| <i>S. IV 45:g,z51:-</i>          | 2        | 0            | 1        | 3        |
| <i>S. I 4:eh:-</i>               | 0        | 2            | 1        | 3        |
| <i>S. Blijdorp</i>               | 1        | 0            | 1        | 2        |
| <i>S. Bolombo</i>                | 1        | 0            | 1        | 2        |
| <i>S. Inverness</i>              | 1        | 0            | 1        | 2        |
| <i>S. Montevideo</i>             | 0        | 1            | 1        | 2        |
| <i>S. Oslo</i>                   | 0        | 1            | 1        | 2        |
| <i>S. II 58:l,z13,z28:z6</i>     | 0        | 1            | 1        | 2        |
| <i>S. IIIb 50:z52:z53</i>        | 1        | 0            | 1        | 2        |
| <i>S. IV 43:z4,z23:-</i>         | 1        | 0            | 1        | 2        |
| <b><i>S. Bispebjerg</i></b>      | <b>0</b> | <b>0</b>     | <b>1</b> | <b>1</b> |

|                                   |          |          |          |          |
|-----------------------------------|----------|----------|----------|----------|
| <b>S. Kisarawe</b>                | <b>0</b> | <b>0</b> | <b>1</b> | <b>1</b> |
| <b>S. Lisboa</b>                  | <b>0</b> | <b>0</b> | <b>1</b> | <b>1</b> |
| <b>S. Overschie</b>               | <b>0</b> | <b>0</b> | <b>1</b> | <b>1</b> |
| <b>S. Reading</b>                 | <b>0</b> | <b>0</b> | <b>1</b> | <b>1</b> |
| <b>S. IIIb 61:i:z</b>             | <b>0</b> | <b>0</b> | <b>1</b> | <b>1</b> |
| <b>S. II 58:l,z13,z28:-</b>       | <b>0</b> | <b>0</b> | <b>1</b> | <b>1</b> |
| <b>S. sp. (rough) IIIb</b>        | <b>0</b> | <b>0</b> | <b>1</b> | <b>1</b> |
| <b>S. IIIb 48:r:z</b>             | <b>0</b> | <b>0</b> | <b>1</b> | <b>1</b> |
| <b>S. II 21:z10:-</b>             | <b>0</b> | <b>0</b> | <b>1</b> | <b>1</b> |
| <b>S. IIIb 47:z10:z35</b>         | <b>0</b> | <b>0</b> | <b>1</b> | <b>1</b> |
| <b>S. IIIb 18:l,v:z</b>           | <b>0</b> | <b>0</b> | <b>1</b> | <b>1</b> |
| <b>S. IIIb 50:r:z</b>             | <b>0</b> | <b>0</b> | <b>1</b> | <b>1</b> |
| <b>S. IIIb 35:i:z35</b>           | <b>0</b> | <b>0</b> | <b>1</b> | <b>1</b> |
| <b>S. IIIb 38:k:1,5,7</b>         | <b>0</b> | <b>0</b> | <b>1</b> | <b>1</b> |
| <b>S. IIIb 58:r:z53</b>           | <b>0</b> | <b>0</b> | <b>1</b> | <b>1</b> |
| <b>S. IIIb 11:l,v:z</b>           | <b>0</b> | <b>0</b> | <b>1</b> | <b>1</b> |
| <b>S. II 17:g,t:-</b>             | <b>0</b> | <b>0</b> | <b>1</b> | <b>1</b> |
| <b>S. IV 41:z4,z23:-</b>          | <b>0</b> | <b>0</b> | <b>1</b> | <b>1</b> |
| <b>S. IV 50:g,z51:-</b>           | <b>0</b> | <b>0</b> | <b>1</b> | <b>1</b> |
| <b>S. I 6,8:-:-</b>               | <b>0</b> | <b>0</b> | <b>1</b> | <b>1</b> |
| <b>S. I 4,5:b:-</b>               | <b>0</b> | <b>0</b> | <b>1</b> | <b>1</b> |
| S. Poano                          | 7        | 1        | 0        | 8        |
| S. Carrau                         | 4        | 1        | 0        | 5        |
| S. Cubana                         | 1        | 4        | 0        | 5        |
| S. Enteritidis                    | 4        | 0        | 0        | 4        |
| S. Kintambo                       | 2        | 2        | 0        | 4        |
| S. Miami                          | 4        | 0        | 0        | 4        |
| S. Nima                           | 4        | 0        | 0        | 4        |
| S. Benin                          | 2        | 1        | 0        | 3        |
| S. Ekpoui                         | 3        | 0        | 0        | 3        |
| S. Fresno                         | 3        | 0        | 0        | 3        |
| S. Jangwani                       | 3        | 0        | 0        | 3        |
| S. Teddington                     | 2        | 1        | 0        | 3        |
| <b>S. IIIa 13,23:z4,z23,z32:-</b> | <b>1</b> | <b>2</b> | <b>0</b> | <b>3</b> |
| <b>S. IV 42:z36:-</b>             | <b>1</b> | <b>2</b> | <b>0</b> | <b>3</b> |
| <b>S. I 45:b:-</b>                | <b>3</b> | <b>0</b> | <b>0</b> | <b>3</b> |
| S. Cotham                         | 1        | 1        | 0        | 2        |
| S. Manhattan                      | 2        | 0        | 0        | 2        |
| S. Muenster                       | 2        | 0        | 0        | 2        |
| S. Mundonobo                      | 1        | 1        | 0        | 2        |
| S. Poona                          | 2        | 0        | 0        | 2        |
| S. Rosslyn                        | 2        | 0        | 0        | 2        |
| S. Urbana                         | 1        | 1        | 0        | 2        |
| <b>S. II 21:g,t:-</b>             | <b>1</b> | <b>1</b> | <b>0</b> | <b>2</b> |
| <b>S. II 21:z10:z6</b>            | <b>1</b> | <b>1</b> | <b>0</b> | <b>2</b> |
| <b>S. IIIb 50:k:z</b>             |          | <b>2</b> | <b>0</b> | <b>2</b> |
| <b>S. IIIb 38:r:z</b>             | <b>2</b> | <b>0</b> | <b>0</b> | <b>2</b> |
| <b>S. IIIb 47:r:z53</b>           | <b>1</b> | <b>1</b> | <b>0</b> | <b>2</b> |
| <b>S. IV 48:g,z51:-</b>           | <b>2</b> | <b>0</b> | <b>0</b> | <b>2</b> |
| <b>S. IV 16:z4,z32:-</b>          | <b>2</b> | <b>0</b> | <b>0</b> | <b>2</b> |

|                              |   |   |   |   |
|------------------------------|---|---|---|---|
| S. IV 38:z4,z23:-            | 2 | 0 | 0 | 2 |
| S. Abony                     | 0 | 1 | 0 | 1 |
| S. Anatum                    | 0 | 1 | 0 | 1 |
| S. Baildon                   | 0 | 1 | 0 | 1 |
| S. Bareilly                  | 1 | 0 | 0 | 1 |
| S. Blukwa                    | 1 | 0 | 0 | 1 |
| S. Braenderup                | 1 | 0 | 0 | 1 |
| S. Chicago                   | 0 | 1 | 0 | 1 |
| S. Choleraesuis var. Decatur | 1 | 0 | 0 | 1 |
| S. Durban                    | 1 | 0 | 0 | 1 |
| S. Gaminara                  | 1 | 0 | 0 | 1 |
| S. Glostrup                  | 1 | 0 | 0 | 1 |
| S. Hofit                     | 1 | 0 | 0 | 1 |
| S. Itami                     | 1 | 0 | 0 | 1 |
| S. Jodhpur                   | 1 | 0 | 0 | 1 |
| S. Johannesburg              | 1 | 0 | 0 | 1 |
| S. Labadi                    | 1 | 0 | 0 | 1 |
| S. Lattenkamp                | 0 | 1 | 0 | 1 |
| S. Lome                      | 1 | 0 | 0 | 1 |
| S. Madelia                   | 1 | 0 | 0 | 1 |
| S. Mountpleasant             | 1 | 0 | 0 | 1 |
| S. Orlando                   | 1 | 0 | 0 | 1 |
| S. Patience                  | 1 | 0 | 0 | 1 |
| S. San Diego                 | 1 | 0 | 0 | 1 |
| S. Senftenberg               | 1 | 0 | 0 | 1 |
| S. Tanzania                  | 1 | 0 | 0 | 1 |
| S. Telelkebir                | 1 | 0 | 0 | 1 |
| S. Toucra                    | 0 | 1 | 0 | 1 |
| S. Treforest                 | 0 | 1 | 0 | 1 |
| S. Uzaramo                   | 0 | 1 | 0 | 1 |
| S. IIIb 35:k:z53             | 1 | 0 | 0 | 1 |
| S. IIIb 57:lv:z35            | 1 | 0 | 0 | 1 |
| S. IIIb 6,14:z10:z           | 0 | 1 | 0 | 1 |
| S. II 9,46:z10:-             | 1 | 0 | 0 | 1 |
| S. IIIa 44:z4,z32:-          | 0 | 1 | 0 | 1 |
| S. IIIa 42:z4,z24:-          | 1 | 0 | 0 | 1 |
| S. II 9:z29:1,5              | 1 | 0 | 0 | 1 |
| S. IIIb 48:k:z53             | 0 | 1 | 0 | 1 |
| S. IIIb 50:k:z57             | 1 | 0 | 0 | 1 |
| S. IIIa 13,23:z4,z32:-       | 1 | 0 | 0 | 1 |
| S. IIIb 48:z52:z             | 0 | 1 | 0 | 1 |
| S. IIIa 48:g,z51:-           | 1 | 0 | 0 | 1 |
| S. IIIa 44:z4,z24:-          | 1 | 0 | 0 | 1 |
| S. IIIa 44:z4,z23:-          | 0 | 1 | 0 | 1 |
| S. IIIb 50:i:1,5,7           | 1 | 0 | 0 | 1 |
| S. IIIa 44:z4,z23,z32:-      | 0 | 1 | 0 | 1 |
| S. IIIa 48:z4,z24:-          | 1 | 0 | 0 | 1 |
| S. II 43:g,m,t:-             | 0 | 1 | 0 | 1 |
| S. IIIa 40:z4,z23,z32:-      | 1 | 0 | 0 | 1 |
| S. II 47:a:1,5               | 1 | 0 | 0 | 1 |

|                          |     |     |     |     |
|--------------------------|-----|-----|-----|-----|
| <i>S.</i> IIIb 50:-      | 1   | 0   | 0   | 1   |
| <i>S.</i> IV 44:z4,z24:- | 1   | 0   | 0   | 1   |
| <i>S.</i> V 48:z65:-     | 1   | 0   | 0   | 1   |
| <i>S.</i> sp. I          | 1   | 0   | 0   | 1   |
| <i>S.</i> sp. (rough) I  | 1   | 0   | 0   | 1   |
| <i>S.</i> I 35:-         | 1   | 0   | 0   | 1   |
| Total                    | 281 | 140 | 113 | 534 |
